# Supplementary material for: First-in-human robotic supermicrosurgery using a dedicated microsurgical robot for treating breast cancer-related lymphedema: a randomized pilot trial
Source: PubMed Central journal article supplement (PMC7012819; doi:10.1038/s41467-019-14188-w), 2020-02-11
Supplement: 41467_2019_14188_MOESM1_ESM.pdf [file 41467_2019_14188_MOESM1_ESM.pdf]

## **Supplementary Information**

First-in-human robotic supermicrosurgery using a dedicated microsurgical robot for treating breast cancer-related lymphedema: a randomized pilot trial

van Mulken TJM, Schols RM, et al.

**Supplementary Figure 1. Duration of the anastomoses in minutes**

**Supplementary Figure 2. Lymph-ICF scores**

**Supplementary Table 1. SAMS and UWOMSA scores of anastomoses performed**

**Supplementary Table 2. Patient comfort and surgeon performance during LVA procedure**

**Supplementary Table 3. Patient comfort and surgeon performance during LVA procedure**

**Supplementary Table 4. Patient comfort and surgeon performance during LVA procedure**

**Supplementary Figure 1. Duration of the anastomoses in minutes**

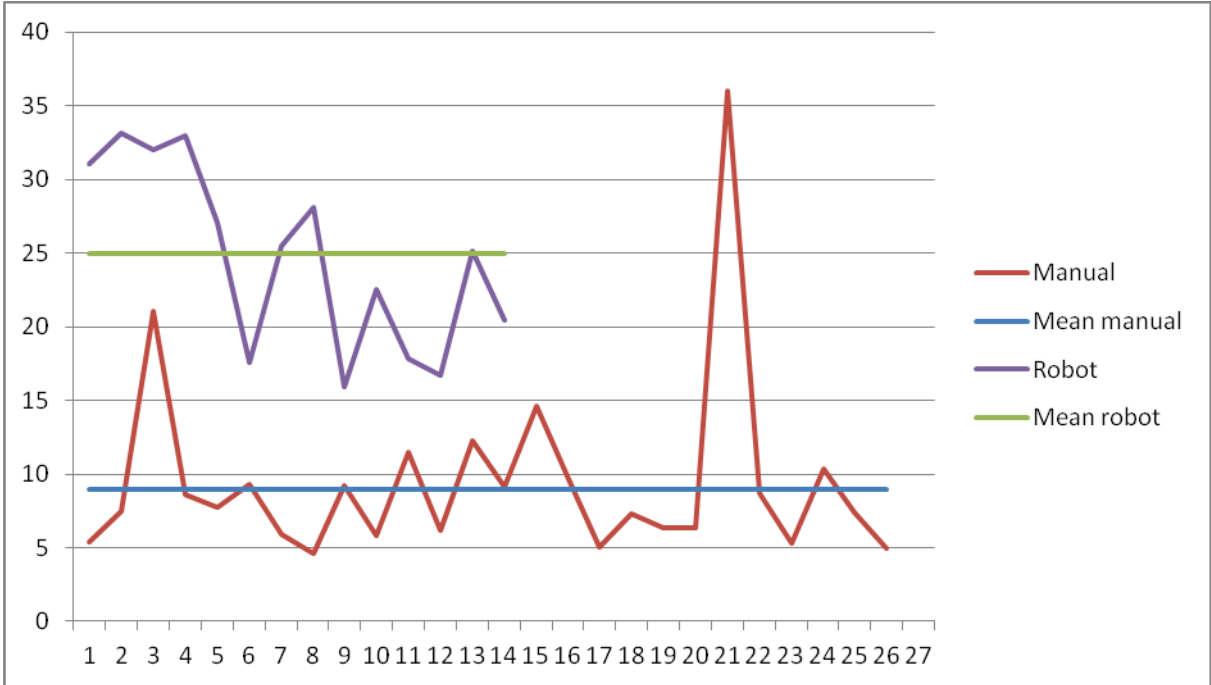

Duration of the anastomoses in minutes completed by robot-assistance versus the manual procedure, in consecutive order. Mean duration of respectively manual (n=14) and robotic (n=26) anastomoses are provided in the figure. Source data are provided as a Source Data file.

**Supplementary Figure 2. Lymph-ICF scores**

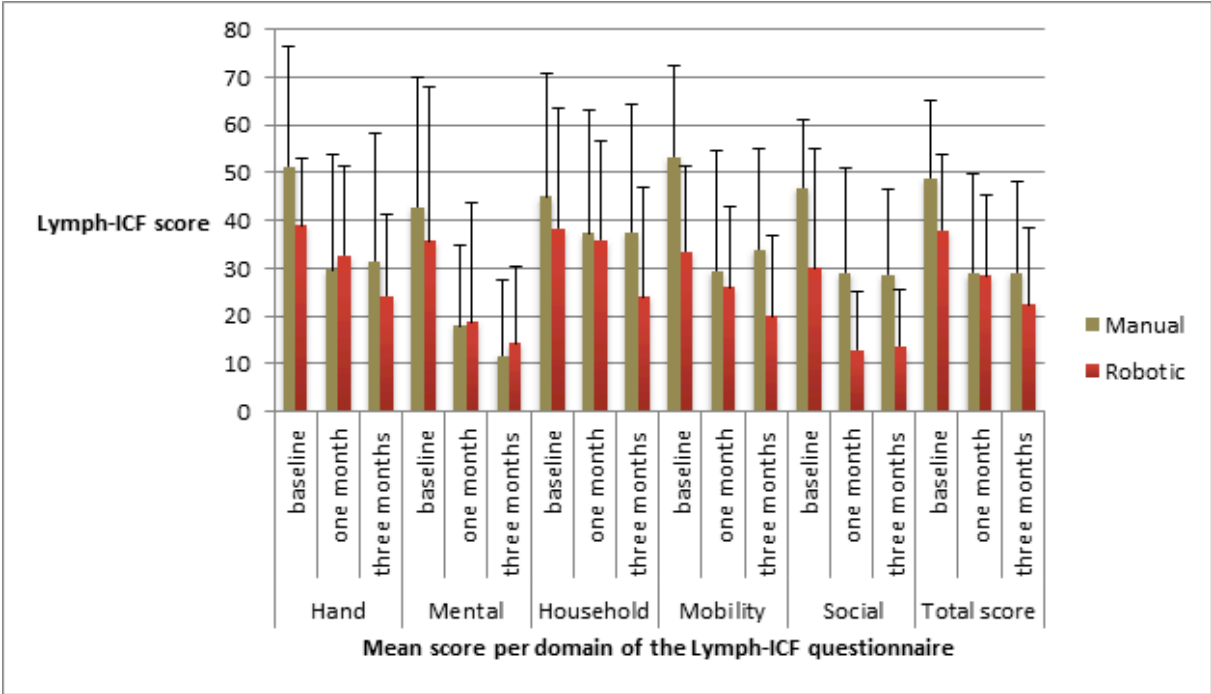

Mean lymph-ICF scores per domain and total score for the robotic and manual LVA group at baseline, one month and three months follow-up. Error bars of SD are included. Source data are provided as a Source Data file.

**Supplementary Table 1. SAMS and UWOMSA scores of anastomoses performed**

|                       |                     | SAMS    |         | UWOMSA        |         |         |
|-----------------------|---------------------|---------|---------|---------------|---------|---------|
|                       |                     | robotic | manual  |               | robotic | manual  |
|                       |                     | (n=14)  | (n=26)  |               | (n=14)  | (n=26)  |
| Dexterity             | Steadiness          | 3.2±0.5 | 3.4±0.5 | Preparation   | 3.5±0.3 | 3.9±0.5 |
|                       | Instrument handling | 3.0±0.5 | 3.8±0.4 | Suturing      | 3.2±0.4 | 3.9±0.4 |
|                       | Tissue handling     | 3.2±0.5 | 3.8±0.4 | Final product | 3.4±0.2 | 4.0±0.5 |
| Visuo-spatial ability | Dissection          | 3.4±0.6 | 4.0±0.4 |               |         |         |
|                       | Suture placement    | 3.5±0.5 | 4.1±0.3 |               |         |         |
|                       | Knot technique      | 3.8±0.5 | 4.3±0.3 |               |         |         |
| Operative flow        | Steps               | 3.2±0.5 | 4.0±0.5 |               |         |         |
|                       | Motion              | 2.9±0.5 | 3.8±0.5 |               |         |         |
|                       | Speed               | 3.0±0.7 | 4.0±0.6 |               |         |         |
| Judgement             | Irrigation          | 4.2±0.6 | 4.6±0.6 |               |         |         |
|                       | Patency test        | 2.4±1.6 | 3.8±0.6 |               |         |         |
|                       | Bleeding control    | 2.8±1.1 | 3.9±0.8 |               |         |         |
| Overall performance   |                     | 3.0±0.7 | 4.0±0.5 |               |         |         |
| Indicative skill      |                     | 3.0±0.6 | 4.0±0.5 |               |         |         |

Data shown as average score of two readers

Mean ± SD of SAMS and UWOMSA scores. Source data are provided as a Source Data file.

## Supplementary Table 2. Patient comfort and surgeon performance during LVA procedure

### Group Statistics

|                                | Surgery: hand or robot | N  | Mean   | Std. Deviation | Std. Error Mean |
|--------------------------------|------------------------|----|--------|----------------|-----------------|
| Comfort during LVA             | hand                   | 12 | 8,5833 | 1,10440        | 0,31881         |
|                                | robot                  | 8  | 8,0000 | 2,00000        | 0,70711         |
| Performance surgeon during LVA | hand                   | 12 | 3,75   | 0,754          | 0,218           |
|                                | robot                  | 8  | 3,13   | 0,641          | 0,227           |

Mean  $\pm$  SD of patient comfort and surgeon performance during LVA respectively. Source data are provided as a Source Data file.

### Supplementary Table 3. Patient comfort and surgeon performance during LVA procedure

#### Independent Samples Test

|                                          |                             |       |       | t-test for Equality of Means |        |                 |                 |                       |                          |         |
|------------------------------------------|-----------------------------|-------|-------|------------------------------|--------|-----------------|-----------------|-----------------------|--------------------------|---------|
|                                          |                             |       |       | t                            | df     | Sig. (2-tailed) | Mean Difference | Std. Error Difference | 95% CI of the Difference |         |
|                                          |                             |       |       |                              |        |                 |                 |                       | Lower                    | Upper   |
| Comfort during LVA procedure             | Equal variances assumed     | 2,205 | 0,155 | 0,843                        | 18     | 0,411           | 0,58333         | 0,69236               | -0,87126                 | 2,03792 |
|                                          | Equal variances not assumed |       |       | 0,752                        | 9,876  | 0,470           | 0,58333         | 0,77566               | -1,14789                 | 2,31456 |
| Performance surgeon during LVA procedure | Equal variances assumed     | 0,230 | 0,637 | 1,923                        | 18     | 0,070           | 0,625           | 0,325                 | -0,058                   | 1,308   |
|                                          | Equal variances not assumed |       |       | 1,990                        | 16,782 | 0,063           | 0,625           | 0,314                 | -0,038                   | 1,288   |

Independent samples test of patient comfort and surgeon performance during LVA respectively. Source data are provided as a Source Data file.

**Supplementary Table 4. Patient comfort and surgeon performance during LVA procedure**

**Statistics**

|                |         | Comfort during LVA procedure | Performance surgeon during LVA procedure |
|----------------|---------|------------------------------|------------------------------------------|
| N              | Valid   | 20                           | 20                                       |
|                | Missing | 0                            | 0                                        |
| Std. Deviation |         | 1,50525                      | 0,761                                    |
| Range          |         | 6,00                         | 3                                        |
| Minimum        |         | 4,00                         | 2                                        |
| Maximum        |         | 10,00                        | 5                                        |

Statistics (SD, Range) of patient comfort and surgeon performance during LVA respectively. Source data are provided as a Source Data file.
