# Supplementary material for: First-in-human robotic supermicrosurgery using a dedicated microsurgical robot for treating breast cancer-related lymphedema: a randomized pilot trial
Source: PubMed Central journal article supplement (PMC7012819; doi:10.1038/s41467-019-14188-w), 2020-02-11
Supplement: 41467_2019_14188_MOESM4_ESM.pdf [file 41467_2019_14188_MOESM4_ESM.pdf]

| LVA<br>(0=hand/1=robot) | Patient<br>comfort | Performance<br>surgeon |
|-------------------------|--------------------|------------------------|
| 1                       | 7                  | 3                      |
| 0                       | 7                  | 4                      |
| 1                       | 7                  | 4                      |
| 0                       | 9                  | 3                      |
| 0                       | 10                 | 4                      |
| 1                       | 4                  | 3                      |
| 0                       | 9                  | 4                      |
| 1                       | 9                  | 3                      |
| 1                       | 9                  | 3                      |
| 0                       | 8                  | 4                      |
| 0                       | 7,5                | 4                      |
| 1                       | 8                  | 2                      |
| 0                       | 7                  | 3                      |
| 1                       | 10                 | 4                      |
| 1                       | 10                 | 3                      |
| 0                       | 10                 | 5                      |
| 0                       | 8                  | 4                      |
| 0                       | 9                  | 2                      |
| 0                       | 10                 | 4                      |
| 0                       | 8,5                | 4                      |
